# REVIEW ARTICLE

Lawrence J. Saidman, Editor

Anesthesiology  
63:424-439, 1985

## Unexplained Hepatitis Following Halothane

Jeremy G. L. Stock, M.B., Ch.B., F.F.A.R.C.S.,\* and Leo Strunin, M.D., F.F.A.R.C.S., F.R.C.P.(C)†

### CONTENTS

|                                      |
|--------------------------------------|
| History                              |
| Early Reports                        |
| Retrospective Studies                |
| Prospective Studies                  |
| Pathology                            |
| Biochemistry                         |
| Occupational Exposure                |
| Animal Work                          |
| Etiology of Halothane Hepatotoxicity |
| Biotransformation                    |
| Hypersensitivity (Immune-mediated)   |
| Hypoxia                              |
| Pharmacogenetics                     |
| Which Patients Are at Risk           |
| Sex                                  |
| Age                                  |
| Preexisting Liver Disease            |
| Obesity                              |
| Type of Surgery                      |
| Enzyme Induction                     |
| Other Inhalation Agents              |
| Enflurane                            |
| Isoflurane                           |
| Conclusion                           |

HALOTHANE WAS INTRODUCED into clinical practice in 1956.<sup>1</sup> Anecdotal cases of unexplained hepatitis following halothane anesthesia (UHFH)—halothane hepatitis—were first described in 1958<sup>2,3</sup> and were soon followed by an increasing number of similar reports, predominantly from the United States.<sup>4-7</sup> Since then enormous amounts

of time, effort, and money have been spent in attempt to unravel the mystery surrounding the existence, incidence, and, more recently, the cause of halothane hepatitis.

The use of halothane has declined markedly in some countries, notably in the United States. While this may have resulted in part from the introduction of alternative agents (enflurane and isoflurane) that may offer certain advantages, undoubtedly a major factor has been the perceived medico-legal consequences of previously healthy patients developing potentially fatal liver damage. Indeed it has been suggested that one should have a positive reason for using halothane in preference to other agents.<sup>8</sup> Is halothane destined for obsolescence? If so, is it worth pursuing the cause of hepatic dysfunction following its use so vigorously? Perhaps we should opt to use other volatile agents or alternative techniques with less serious and more predictable side effects?

There are a number of reasons for considering such an attitude unreasonable and unrealistic. First, many authorities agree that halothane is a useful and safe agent.<sup>9,10</sup> Second, it is considerably cheaper than enflurane and particularly isoflurane. This may not be an overriding priority in affluent countries, although all physicians should consider the cost-effectiveness of their practice. Third, although diethyl ether continues to be advocated and used for anesthesia in developing countries, it is not an agent that is easy to administer and it precludes the use of electrical cautery.<sup>11</sup> An increasing number of anesthesiologists working in these countries have trained in Europe or North America and have little experience with diethyl ether. Halothane is much easier to manage and can be delivered via systems now being advocated for use in this environment.<sup>12</sup> It seems certain, therefore, that halothane will play an important role in developing countries for the foreseeable future. Enflurane and isoflurane are also halogenated hydrocarbons and also may have the potential to produce hepatotoxicity.<sup>13</sup> Finally, an insight into the cause(s) of halothane hepatitis is necessary in order to predict the likelihood of toxicity with new agents as they are developed.

It seems appropriate at this time to review the published data on UHFH and see how far it has taken us toward answering those questions of concern to the clinical anes-

\* Lecturer in Anaesthesia.

† Professor of Anaesthesia.

Received from the Department of Anaesthesia, Foothills Hospital at the University of Calgary, Alberta, Canada T2N 2T9. Accepted for publication May 7, 1985.

Address reprint requests to Dr. Strunin.

Key words: Anesthetics, volatile: halothane; enflurane; isoflurane. Biotransformation: metabolites. Liver: hepatotoxicity; hypoxia, immune response, metabolism. Postoperative complications: jaundice. Toxicity: hepatic.

thesiologist: can we predict who is at risk and, if so, in whom should we avoid halothane? Are there any measures that will decrease the risk?

Unexplained hepatitis following halothane (UHFH), or as it is commonly defined, "halothane hepatitis," is a very rare complication of halothane anesthesia. Jaundice, *i.e.*, a rise in bilirubin concentration, with or without other changes in liver function tests, is common after anesthesia and surgery.<sup>9</sup> Such changes relate to preexisting liver disease, blood transfusion, infection, viral hepatitis, and the extent of the surgical procedure. These causes are easily diagnosed, and it is extremely unusual for patients with these conditions to have fulminant hepatic failure develop as a primary condition postoperatively. However, if viral hepatitis is responsible, with the exception of non-A non-B hepatitis, serologic testing can distinguish this from other causes of hepatitis.

This review focuses on those patients where all reasonable causes of postoperative hepatitis following halothane anesthesia have been excluded, yet the patient is unwell, and a diagnosis of halothane hepatitis is made.

### History

Halothane was synthesized by Suckling in 1952 for Imperial Chemical Industries.<sup>14</sup> After preliminary pharmacologic studies by Raventos,<sup>15</sup> it was introduced into clinical practice in 1956.<sup>1</sup> Its many advantages over other agents led to a rapid and widespread increase in its usage.

Initial animal work had indicated either an absence of hepatotoxicity<sup>5-17</sup> or minor disturbance similar to that seen with diethyl ether.<sup>18</sup> In particular, no hepatic necrosis was observed following halothane administration (*cf.* chloroform and divinyl ether).<sup>19</sup>

### EARLY REPORTS

Early clinical reports appeared to confirm these animal studies.<sup>20,21</sup> However, cases of postoperative liver necrosis after use of halothane were published in 1958,<sup>2-5</sup> and further reports noting the clinical and pathologic similarities between UHFH and chloroform hepatotoxicity followed.<sup>6,7,22</sup>

### RETROSPECTIVE STUDIES

The concern provoked by these reports stimulated a number of retrospective surveys of hepatic dysfunction following general anesthesia. Whether hepatic necrosis at postmortem<sup>23-25</sup> or clinical evidence of liver damage<sup>23,26-29</sup> was used as the criterion, no study was able to show a significantly increased incidence of hepatotoxicity following halothane anesthesia. The indecisive nature of these conclusions led the National Institute of Health to conduct a large, multicenter review of fatal he-

patic necrosis occurring within 6 weeks of anesthesia.<sup>30</sup> The results of the National Halothane Study published in 1969, familiar to most anesthesiologists, are frequently misquoted or misinterpreted.<sup>9</sup> In some 850,000 cases (only 250,000 of whom received halothane) there were 82 cases of fatal hepatic necrosis. Only nine were unexplainable on other grounds: of these, seven had received halothane, four on more than one occasion within 6 weeks. The true incidence of unexplained fatal hepatic necrosis following halothane from this study is, therefore, seven in 250,000 (one in 35,000), and not one in 10,000, as frequently quoted. The National Halothane Study concluded that unexplained fever and jaundice in a specific patient following halothane might reasonably be considered a contraindication to subsequent use. Later, Dykes and Bunker<sup>62</sup> noted that there was not a single patient in the National Halothane Study who was jaundiced after administration of halothane and died after a second administration, and who was found at necropsy to have suffered massive or intermediate hepatic necrosis!

In 1970, the suggestion of a link between repeated halothane anesthesia, radiation therapy, and liver damage was made.<sup>31</sup> However, this contention was not always confirmed by others.<sup>32-34</sup> Indeed the very existence of halothane hepatitis as an entity was still open to debate in the early 1970s.<sup>35,36</sup> Nevertheless, later studies seemed to confirm that severe hepatic dysfunction did follow halothane anesthesia, albeit rarely, with an incidence of between one in 6000 and one in 20,000.<sup>37,38</sup> In addition, an association between multiple exposures and both decreasing latency before manifestation and increasing severity of liver dysfunction was identified.<sup>37-40</sup> However, the well-recognized deficiencies of retrospective analysis<sup>9</sup> led to attempts to further elucidate the issue by other means.

Walton *et al.* in 1976<sup>41</sup> comprehensively reviewed cases of hepatic dysfunction following anesthesia throughout the United Kingdom at the time of report, thus achieving a more thorough and uniform investigation of patients. Two hundred four cases of postoperative jaundice reported were reviewed blindly by a panel of hepatologists, and 76 patients were classified as UHFH. This study reaffirmed the association between UHFH and multiple exposure: 95% of the cases followed multiple halothane anesthesia; 55% followed reexposure within 4 weeks. It also indicated an increased incidence in the obese and in middle-aged women. The demonstration of thyroid autoantibodies in a high percentage of the patients seemed to lend credence to an immune hypothesis for UHFH.<sup>42,43</sup>

### PROSPECTIVE STUDIES

In reviewing early prospective studies, Little concluded that hepatic dysfunction was no more common after hal-

othane than other available agents.<sup>44</sup> However, none of these studies used halothane-free machines for nonhalothane cases, and repeated anesthesia was not studied.<sup>9</sup>

In 1975, two studies of multiple halothane anesthesia were published in the United Kingdom.<sup>45,46</sup> The first showed that aspartate aminotransferase (AST) levels were higher in urologic patients undergoing repeat halothane anesthesia than those receiving trichloroethylene (from a halothane-free circuit).<sup>45</sup> In the second study in patients undergoing multiple anesthesia during treatment for carcinoma of the cervix, alanine aminotransferase (ALT) levels were significantly elevated in four of 18 patients receiving halothane (cf, 0 of 21 controls). Two of these four patients showed a hepatitic picture on liver biopsy.

Unfortunately, these findings were not reproduced in subsequent similar studies. McEwan<sup>47</sup> found a tendency for AST and ALT levels to be higher in patients receiving nonhalothane anesthesia after previous halothane than those getting repeat halothane. Allen and Downing<sup>34</sup> found only minimal elevation in liver enzyme values in patients receiving multiple anesthetics with either halothane or enflurane, although the gap between reexposure was considerably in excess of 28 days.

A further study by Fee *et al.* from Belfast<sup>48</sup> seemed to indicate an increased incidence of liver enzyme abnormalities after multiple halothane anesthesia than with multiple enflurane anesthesia, although no patients had postoperative jaundice develop. But when obese patients and those receiving repeat anesthesia within 6 weeks were excluded, there were no significant differences between agents.<sup>49</sup>

The rarity of halothane hepatitis means that large studies are necessary to provide useful data. Their cost in both time and money is likely to be prohibitive in the future. When ethical objections are also considered, it is not surprising that recent research has focused on the development of animal models.<sup>50-52</sup>

### Pathology

The early clinical reports of fatal hepatic necrosis following halothane identified no distinguishing pathologic features. However, the similarity to lesions produced by known hepatotoxins, *e.g.*, carbon tetrachloride, was noted.<sup>5</sup> Many subsequent reports emphasized the presence of centrilobular necrosis.<sup>7,22,25,53-57</sup> The distribution and pattern of this centrilobular necrosis was felt by many to be distinguishable from that seen following viral hepatitis.<sup>53,58</sup> The presence of fatty infiltration also was noted by a number of authors.<sup>6,7,25,31,54,57,59</sup> However, others have acknowledged difficulties in distinguishing halothane hepatitis from viral hepatitis on light microscopy.<sup>6,39,56,57,60,61,63-66</sup> Although the pathologic features

suggestive of drug-induced liver injury were outlined in 1974 by an international group of pathologists,<sup>67</sup> these features were not found to be helpful in distinguishing halothane-induced hepatitis from other causes of postoperative jaundice.<sup>68,41</sup>

A few reports have included electron microscopy (EM) of liver biopsy specimens.<sup>56,63,69</sup> Distinctive mitochondrial abnormalities were seen by some authors<sup>56,63</sup> but not by others.<sup>69</sup> The absence of recognizable EM features also was noted by Wills and Walton,<sup>68</sup> who concluded that neither light nor electron microscopy had useful diagnostic value in differentiating halothane hepatitis from other causes of postoperative hepatic dysfunction. A later EM study of intraoperative liver biopsies before and after exposure to different anesthetic agents did show an increased incidence of changes with halothane compared with enflurane and narcotic anesthesia.<sup>70</sup> However, since no patients in this study had postoperative hepatic dysfunction develop, it is impossible to assess the importance of EM changes in the diagnosis of halothane hepatitis.

Although UHFH can progress rapidly to fatal massive hepatic necrosis, in those patients who recover, repeat histologic examination shows considerable resolution of the lesions.<sup>71,72</sup> There are only two cases reporting progression to chronic liver disease: in one, there was recurrent occupational exposure<sup>42</sup>; in the other, the diagnosis of chronic active hepatitis was made three months after exposure, and subsequent follow-up was not reported.<sup>73</sup>

### Biochemistry

Although most early reports focused on hepatic necrosis following halothane, a number of later studies have looked at elevation of transaminase and other liver enzymes after halothane.<sup>45,46,48</sup> Not all such studies have demonstrated an increased incidence of liver enzyme disturbance after halothane compared with other volatile agents.<sup>34,47,74</sup> The incidence of minor hepatic dysfunction following halothane is unknown,<sup>75</sup> and there are many causes of a similar pattern of liver enzyme elevation, notably viral hepatitis.<sup>10</sup> Indeed, reversible, minor changes in liver function are common in the postoperative period, regardless of the type of anesthesia.<sup>28,76,77</sup> The pitfalls of a diagnosis based on biochemical disturbances have been highlighted by Schemel,<sup>78</sup> who found that 11 of 7,620 ASA I patients scheduled for elective surgery had preoperative elevation of liver enzymes. Although surgery was canceled in all cases, three patients had jaundice develop. It is highly likely that the biochemical and clinical hepatic dysfunction detected in these patients postoperatively would have been attributed to the anesthetic agent used, had this been halothane. Routine postoperative screening of liver enzymes to detect those at risk from

subsequent halothane anesthesia has been suggested,<sup>79</sup> but the high cost benefit ratio of such a policy has been emphasized.<sup>80</sup>

The problem of differentiating halothane hepatitis from viral hepatitis presenting in the perioperative period is a real one.<sup>81</sup> It has been estimated that of every million patients anesthetized with all agents, approximately 100 might become jaundiced in the postoperative period because of viral A hepatitis.<sup>82</sup>

### Occupational Exposure

Unexplained hepatic dysfunction in medical personnel occupationally exposed to halothane has been reported.<sup>42,83-85</sup> The recurrence of liver dysfunction following deliberate reexposure to halothane has been called "the most compelling evidence of the existence of halothane hepatitis."<sup>86</sup> However, certain aspects of these case studies have been criticized<sup>35</sup>; moreover, none of the patients was challenged with any other agent (or placebo). Two further cases have been described<sup>87</sup>; in both individuals halothane-related antibody was detected in the serum.

The frequent observation of an increased incidence of halothane hepatitis after multiple exposures within a short period<sup>37,41</sup> seems to be at variance with the rare occurrence of hepatitis in personnel repeatedly exposed to trace concentrations of halothane. Cascorbi<sup>88</sup> found an apparent increase in metabolism of halothane in a small group of exposed personnel compared with nonexposed pharmacists, however, a similar larger study<sup>175</sup> by Cascorbi showed no difference. Rehder<sup>89</sup> has shown an increasing metabolism of halothane in one anesthesiologist over a 2-year period of occupational exposure. Some studies have indicated an increased incidence of hepatic disease in exposed anesthesiologists and dentists compared with control populations,<sup>90,91</sup> although it is not possible to exclude viral hepatitis as a factor in these cases.<sup>9</sup>

### Animal Work

Most early studies in dogs,<sup>15,16,18</sup> monkeys,<sup>16,92</sup> and rats<sup>17,93,94</sup> revealed no evidence of hepatic necrosis after halothane and no increased incidence of hepatic dysfunction as compared with diethyl ether. However, positive reports of liver damage were published by some workers,<sup>95,96</sup> although in the first of these studies, halothane was administered intraperitoneally, resulting in a very high hepatic blood concentration, and in the second, the guinea pig was used. Subsequent work has shown that anesthetic concentrations of halothane cause profound hypotension in this model.<sup>9,97</sup>

Following Van Dyke's demonstration that halothane undergoes phenobarbital-inducible biotransformation by

the mixed-function oxidase (MFO) system in hepatic microsomes,<sup>98-100</sup> interest in the use of enzyme-induced animal models increased. In 1976, Sipes and Brown<sup>50</sup> demonstrated a high incidence of hepatic necrosis in rats pretreated with a polychlorinated biphenyl (PCB), even in 100% oxygen. However, since PCB can cause morphologic changes in the liver *per se*,<sup>101</sup> this may not be the most appropriate model. An apparently more reliable model uses phenobarbital (PB)-pretreated rats exposed to halothane in an hypoxic environment.<sup>51,52</sup> Cousins *et al.*<sup>102</sup> have demonstrated qualitative and quantitative similarities in the metabolism of halothane in rats and humans and in the histologic lesions produced in the liver. However, claims that this model is valid and relevant to the human situation<sup>75</sup> rely on reductive metabolism being etiologically important in human halothane hepatotoxicity; this contention is not yet supported by direct evidence.

The use of animal models introduces a number of problems because of variations in route and extent of metabolism between species.<sup>103,104</sup> For example, PB/hypoxic mice do not show hepatotoxicity to halothane.<sup>105</sup> In addition, there are age<sup>106,107</sup> and sex<sup>104,108</sup> differences in drug metabolism and toxicity. Even in a species with apparent similarities to humans, *e.g.*, the rat, there are differences between strains in metabolism of halothane (and other agents) and susceptibility to organ toxicity.<sup>109,110</sup>

Recently the validity of the PB/hypoxic rat as a model of halothane hepatotoxicity resulting from reductive metabolism has come into question. The PB/hypoxic rat model does not always show reproducible hepatotoxicity within the same institution<sup>111</sup>; the incidence of hepatic necrosis varies, depending on the vendor of the animals<sup>112</sup>; and the ease of reproducibility follows a seasonal variation.<sup>113</sup> Hypoxia alone can produce hepatic necrosis in PB-pretreated rats.<sup>114</sup> In addition, enflurane and isoflurane are both capable of producing hepatic necrosis in PB/hypoxic, starved rats.<sup>111,115</sup> Shingu *et al.*<sup>116</sup> were unable to distinguish between halothane and other inhalation (enflurane and isoflurane) and intravenous (thiopental and fentanyl) agents in hypoxic (10% O<sub>2</sub>), enzyme-induced rats. These data suggest an alternative mechanism for hepatotoxicity is more likely, since metabolism of enflurane and isoflurane is low and reductive metabolism nonexistent.<sup>116</sup> In addition, the incidence of hepatic necrosis was higher in PB/hypoxic rats exposed to high concentrations of halothane for short periods as opposed to low concentrations for long periods.<sup>117</sup> Since the metabolism of halothane is proportionally greater at low (subanesthetic) concentrations,<sup>118,119</sup> this is the converse of what one would expect if metabolites were directly responsible for toxicity. Unfortunately, evaluation of this data is complicated by variations in oxygen concentration, temperature control, source and strain of rats, starvation, and

histologic classification between studies.<sup>112,120</sup> It may be significant that studies showing hepatotoxicity with other agents have used more severe hypoxia ( $FI_{O_2} = 0.06-0.10$ ),<sup>111,116</sup> since neither enflurane nor isoflurane produce hepatotoxicity in the PB-rat in 14% oxygen.<sup>121</sup> Development of liver injury with enflurane in the rat requires maintenance of body temperature as well as profound hypoxia, in contrast to halothane, and the time course of development of the lesions resembles that seen with severe hypoxia (5% oxygen) alone, rather than that seen with halothane.<sup>122</sup> It is possible, therefore, that the two models are distinct.

Extrapolating data from the PB/hypoxic rat model to the human situation is difficult. There is some evidence of a dose-response relationship in the hypoxic rat,<sup>123</sup> in contrast to the clinical situation. In humans, enzyme induction is not a factor in liver damage.<sup>113</sup> Clinical hepatotoxicity may be rapidly progressive and often fatal, whereas rats in which hepatotoxicity develops do not die from liver failure and they recover quickly.<sup>123</sup> In rats there is no increase in incidence or severity of hepatic dysfunction with multiple exposures.<sup>124</sup> Indeed, Reynolds and Moslen<sup>125</sup> found a decreasing incidence of liver necrosis with repeated exposure to halothane in their rat model.

Other rat models using triiodothyronine ( $T_3$ )<sup>126-128</sup> or chronic ethanol pretreatment<sup>129</sup> have been described.  $T_3$  pretreatment results in hepatic necrosis in rats exposed to halothane even in nonhypoxic environments.<sup>126,128</sup> Hepatic necrosis in  $T_3$  rats was seen with both enflurane and isoflurane by Berman<sup>130</sup> and with halothane by Wood *et al.*<sup>126</sup> Hyperthyroidism does enhance the metabolism of halothane and enflurane<sup>131</sup> and also enhances the toxicity of other hepatotoxins, including carbon tetrachloride ( $CCl_4$ ),<sup>132</sup> chloroform ( $CHCl_3$ ),<sup>128</sup> and acetaminophen,<sup>133</sup> which act via toxic intermediate metabolites. Nevertheless, although there is some evidence linking reductive metabolism and hepatotoxicity in the PB/hypoxic rat model, the mechanism in the  $T_3$  rat appears to be different.<sup>127,128</sup> It seems more likely that intracellular hypoxia secondary to the increased metabolic rate is involved in this model.<sup>127,130</sup>

Tagaki *et al.*<sup>129</sup> reported extensive hepatic necrosis in chronic ethanol-pretreated rats exposed to halothane in 10%  $O_2$ . Chronic alcohol administration causes induction of hepatic microsomal enzymes in rats and humans<sup>29</sup> and increases susceptibility to hypoxic liver damage.<sup>134</sup> However, since hypoxia *per se* can lead to hepatic necrosis,<sup>114</sup> the relevance of the ethanol pretreatment in this model is unclear. There is no correlation between chronic alcohol ingestion or hyperthyroidism and UHFH in humans.

Recently, Cousins *et al.* have revived interest in the use of a guinea pig model.<sup>135</sup> This model appears to be more relevant to the human situation, since neither enzyme induction nor hypoxia are required for the production

of hepatotoxicity. Although similar hypotension occurs in this model with both halothane and isoflurane,<sup>136</sup> hepatic necrosis is only seen with halothane, suggesting that hypotension is unlikely to be responsible for the liver damage observed.

While these animal models have certainly been important in describing the biotransformation of halothane, it is by no means certain that they have shed much light on the cause of halothane hepatotoxicity in humans.

## Etiology of Halothane Hepatotoxicity

### BIOTRANSFORMATION

Following the demonstration of chloroform metabolism,<sup>137</sup> Van Dyke found biotransformation of halothane *in vitro* and *in vivo* and showed that this occurred in the microsomal fraction of the liver, was NADPH- $O_2$  dependent, and was inducible with PB.<sup>98-100</sup> Biotransformation in humans was confirmed by Stier,<sup>138</sup> who detected free bromide (Br) in the urine following halothane anesthesia. The extent of this metabolism was quantified by Rehder *et al.*,<sup>89</sup> who recovered 20% of absorbed halothane as urinary metabolites, predominantly Br and trifluoroacetic acid (TFAA). At this stage, attention focused solely on oxidative metabolism. Reductive defluorination of the trifluoromethyl moiety of halothane was not considered possible, and fluoride levels *in vivo* were very low.<sup>139</sup>

However, neither oral nor intraperitoneal administration of TFAA to rats or mice produced significant hepatotoxicity.<sup>140-142</sup> Although some evidence for hepatotoxicity due to the precursors of TFAA—trifluoroacetaldehyde and trifluoroethanol—does exist,<sup>143</sup> other workers have failed to show hepatic necrosis with trifluoroethanol.<sup>141</sup> The formation of trifluoroethanol, as a metabolite of halothane, although postulated,<sup>144</sup> has never been demonstrated in humans, and formation of trifluoroacetaldehyde has never been shown in humans or other animals.<sup>103</sup> Although psychoactive, and near-sedative blood Br concentrations may be reached following halothane anesthesia,<sup>145-147</sup> there is nothing to link Br formation with hepatotoxicity.

In 1969, using low-temperature, whole-body autoradiography, Cohen<sup>148</sup> demonstrated that fluorinated, nonvolatile metabolites of halothane were covalently bound to liver macromolecules in mice for 2 weeks after halothane exposure, and this binding was increased by 40% in PB-induced animals.<sup>149</sup> However, this binding could not be correlated with hepatic necrosis, since no such necrosis was seen. Some workers found evidence suggesting that halothane could induce its own metabolism,<sup>148,150,151</sup> which seemed relevant, given the clinical association between enhanced toxicity and repeat exposures. However, other workers failed to demonstrate this phenomenon,<sup>152,153</sup> possibly because of variations in con-

centrations administered.<sup>118,119,154</sup> The relevance of reductive metabolism of halothane to the pathogenesis of UHFH was first suggested by the work of Uehleke *et al.*,<sup>155</sup> who showed increased *in vitro* binding of labeled halothane metabolites to rabbit microsomal protein (from PB-induced animals) under anerobic conditions.

The binding of halothane metabolites to rat liver microsomes was characterized by Van Dyke *et al.*; binding occurs in the microsomal fraction<sup>156</sup>; is enhanced by inducers of cytochrome-P450, *e.g.*, PB<sup>156</sup> and PCB,<sup>157</sup> but not by inducers of cytochrome-P448, *e.g.*, 3-methylcholanthrene (3MC)<sup>158</sup>; is enhanced in anaerobic conditions,<sup>159-161</sup> and by decreased perfusion in the isolated, perfused liver<sup>158</sup>; and is reduced by enzyme inhibitors, *e.g.*, metyrapone,<sup>159</sup> carbon monoxide,<sup>158,160</sup> and SKF-525A.<sup>158</sup> Binding occurs to both lipid and protein fractions,<sup>158,161</sup> but in anaerobic conditions binding to lipid is greatly enhanced (with an associated massive increase in F release *in vivo*).<sup>162</sup>

These studies can be compared with the whole animal studies of Jee *et al.*<sup>123</sup> in rats exposed to halothane, demonstrating increased hepatotoxicity in the presence of inducers of cytochrome-P450 (PB and PCB), and significant protection with pretreatment with the enzyme inhibitors SKF-525A and metyrapone. The sulphadryl donator cysteamine afforded some protection when given up to 8 h after exposure. More recently, cimetidine has been shown to reduce halothane-induced hepatotoxicity in the rat.<sup>163,164</sup> This apparently results from selective inhibition of the reductive metabolic pathway,<sup>164</sup> although cimetidine can also inhibit oxidative metabolism in normoxic conditions.<sup>165</sup>

In 1975, Cohen *et al.*<sup>166</sup> identified two new urinary metabolites of halothane following intravenous administration of labeled halothane to legally dead heart transplant donors: N-trifluoroacetyl-2-aminoethanol, derived from oxidative metabolism; and a defluorinated mercapturic acid, N-acetyl-S-(2-bromo-2-chloro-1,1-difluoroethyl)-L-cysteine. This latter is thought to derive from the conjugation of 2-bromo-2-chloro-1,1-difluoroethylene (BCDF) with glutathione. Formation of BCDF had been postulated previously by Ullrich and Schnabel<sup>167</sup> in 1973 and has subsequently been demonstrated in humans but only in closed circuit systems,<sup>168</sup> where it appears to form by a reaction between halothane and warm, moist soda lime.<sup>169</sup> The presence of a defluorinated metabolite in humans indicates that reductive metabolism can occur. However, BCDF is unlikely to be responsible for hepatotoxicity, at least in the rat, since the BCDF conjugate has not been found in this species. Moreover, BCDF is scavenged by glutathione, and glutathione depletion in PB/hypoxic rats exposed to halothane does not lead to increased hepatotoxicity.<sup>51</sup> In addition, mice exposed to BCDF do not show liver damage.<sup>170</sup>

The presence of the trifluoroacetyl ethanolamide conjugate in human urine is thought to arise by hydrolysis of trifluoroacetyl-phosphatidylethanolamine following binding to phospholipid.<sup>171</sup> However, this metabolite has not been demonstrated in the rat, and Sipes *et al.*<sup>172</sup> have shown that halothane and <sup>3</sup>H-halothane (which undergoes similar reductive but very little oxidative metabolism) produce equal hepatotoxicity in the rat. It seems that reductive metabolism is more important etiologically in this model, and therefore the oxidative product, N-trifluoroacetyl-2-aminoethanol, is unlikely to be a causative agent.

In 1977, Mukai *et al.*<sup>173</sup> identified 2-chloro-1,1,1-trifluoroethane (CTF) and 2-chloro-1,1-difluoroethylene (CDF) in the expired breath of rabbits exposed to halothane. The formation of these compounds subsequently has been confirmed in both rats and humans.<sup>102,174</sup> In the enzyme-induced rat, the levels of CTF and CDF are greatly increased in blood, liver, and expired breath.<sup>102</sup> However, it is unlikely that these end products of reductive metabolism are responsible for hepatotoxicity, even in the rat, since different strains show a varying incidence of liver toxicity, despite similar levels of CTF and CDF in the expired breath.<sup>110</sup> Other workers have failed to show liver damage in animals exposed to CDF and CTF,<sup>170-176</sup> although Brown *et al.*<sup>177</sup> did show liver damage in rats after injection of CTF in propylene glycol into the portal vein.

Metabolic pathways explaining the formation of the observed metabolites of halothane have been proposed, involving the formation of reactive free-radical<sup>102,168,169</sup> and carbanion<sup>102,167</sup> intermediates. It is known that the classical hepatotoxins CCl<sub>4</sub> and chloroform (CHCl<sub>3</sub>) act via reactive, free-radical intermediates.<sup>178</sup> Although free-radicals are trapped during halothane administration *in vivo*,<sup>121</sup> they also are formed when halothane is administered in 14% oxygen to non-enzyme-induced rats, conditions not normally associated with liver necrosis in this model.<sup>121</sup> Nevertheless, the extent of free radical formation in the rat with different volatile anesthetics does parallel their hepatotoxicity.<sup>179</sup> Eade *et al.*<sup>124</sup> have shown a decreased frequency of hepatic necrosis in PB rats pretreated with the free-radical scavenger diethyldithiocarbamate. However, there is no direct evidence that free-radicals (or other reactive intermediates) are responsible for halothane hepatotoxicity.<sup>169</sup>

Reactive intermediates could produce liver damage directly or indirectly by causing peroxidative decomposition of fatty acids in the phospholipid portion of the cell membrane, with subsequent damage to vital intracellular structures, *e.g.*, endoplasmic reticulum and mitochondria.<sup>125,171,180,181</sup> Diene conjugate formation (a marker of lipo-peroxidation) in the rat is increased by enzyme induction<sup>180</sup> and hypoxia,<sup>161</sup> conditions associated with

enhanced hepatotoxicity and reduced by pretreatment with the free-radical scavenger diphenyl-p-phenylenediamine.<sup>180</sup> However, it would appear that lipo-peroxidation is a result, rather than a cause, of halothane-induced hepatotoxicity.<sup>182</sup>

By 1982, it appeared that there was substantial evidence that reductive biotransformation played a crucial role in the production of halothane hepatotoxicity in the PB/hypoxic rat, although none of the identified metabolites had been shown to be toxic in themselves.<sup>183</sup> However, there was no direct evidence to support such an argument in humans. Moreover, the numerous differences between the conditions required for toxicity in the rat, for example, hepatotoxicity, cannot be induced in female or young animals, and the clinical situation in humans left some authors sceptical as to the value of this model in determining the cause of UHFH.<sup>113</sup> During the last 2 years, other workers have produced evidence that brings into question the specificity of the PB rat model. Thus, other inhalation and intravenous anesthetics,<sup>116</sup> hypoxia *per se*,<sup>114</sup> and interference with hepatic arterial flow or surgical trauma<sup>184</sup> can all produce similar hepatic lesions in the PB rat. Much of this recent data seem to support liver hypoxia as an etiologic factor, at least in the profoundly hypoxic rat model. It has been suggested that the relatively common, mild, transient hepatic dysfunction seen after halothane (and other anesthetics) has a different etiology from the rare, fulminant form.<sup>185</sup> If reductive metabolism is important in humans, it may be in the formation of molecules capable of acting as haptens that provoke a hypersensitivity response and produce the rarer, more severe form.<sup>107,120</sup>

#### HYPERSENSITIVITY (IMMUNE-MEDIATED)

Early evidence in support of the idea that a hypersensitivity response to halothane (or more likely to one of its metabolites) was responsible for UHFH included the frequent association with multiple exposures<sup>37,41,44</sup>; the observation that mild fever after a first exposure was followed in some cases by frank jaundice on re-exposure<sup>186,187</sup>; the association with fever and eosinophilia<sup>41</sup>; the frequent history of drug allergy or atopy<sup>188</sup>; the positive challenge tests described by Klatskin and Kimberg<sup>42</sup> and Belfrage *et al*<sup>183</sup>; and the demonstration of circulating antibodies to liver kidney microsomes,<sup>41</sup> thyroid,<sup>41</sup> nucleic contents,<sup>39</sup> smooth muscle,<sup>39</sup> and mitochondria.<sup>189</sup> However, the value of unexplained fever after halothane as an indicator of sensitization has been questioned<sup>190</sup>; the symptoms and signs of severe liver disease of any cause can mimic an immune reaction with fever, rashes, and eosinophilia<sup>10</sup>; and cases of UHFH can follow first exposure.<sup>107</sup>

Lymphocyte transformation (LTT) and leukocyte migration inhibition tests (*in vitro* indicators of cell-mediated immunity) have been used to try and demonstrate hyper-

sensitivity responses in patients with UHFH. Paronetto and Popper<sup>43</sup> demonstrated a positive lymphocyte transformation test in patients with suspected halothane hepatitis, but other workers were unable to confirm this.<sup>39,191,192</sup> A positive leukocyte migration inhibition test also has been reported in patients with UHFH,<sup>193,194</sup> whereas the test had negative results in normal subjects, healthy anesthesiologists, patients with other liver disease, and patients exposed to halothane without sequelae,<sup>194</sup> suggesting that the test might have value in diagnosis and screening. However, a later report indicated that both false-positive and false-negative results can occur.<sup>195</sup>

The demonstration by Uehleke *et al.*<sup>155</sup> that halothane metabolites could bind covalently to liver macromolecules suggested that these metabolites might act as haptens and thereby provoke an immune response. TFAA protein complexes were shown to be capable of provoking antibody and delayed hypersensitivity (cutaneous) responses in guinea pigs.<sup>196,197</sup> However, Reves and McCracken<sup>141</sup> were unable to induce hepatic necrosis in similarly sensitized guinea pigs subsequently challenged with halothane, and Walton *et al.*<sup>198</sup> were unable to demonstrate a cell-mediated response (lymphocyte transformation test or leukocyte migration inhibition test) to TFAA protein conjugates with the use of serum from patients with UHFH. More recently, Ford and Coyle<sup>199</sup> were unable to demonstrate any increased liver toxicity in PB/hypoxic rats sensitized to TFAA protein complex.

In 1978 Vergani *et al.*<sup>200</sup> showed *in vitro* sensitization of leukocytes from patients with UHFH to hepatocytes from rabbits previously exposed to halothane. No such sensitization was seen when liver cells from ether-pretreated animals were used as the antigen. In 1980 the same group of workers detected circulating antibodies that bound to the surface membrane of halothane-altered rabbit hepatocytes in nine of 14 samples from 11 patients with UHFH.<sup>201</sup> In addition, normal lymphocytes could be induced into becoming cytotoxic to halothane-altered (but not ether-altered) rabbit hepatocytes by incubating them with serum from patients with UHFH. The authors claimed specificity for this test, since serum from patients with acetaminophen-induced liver failure did not render lymphocytes cytotoxic to acetaminophen-pretreated hepatocytes. Nevertheless, the antibodies were detected more frequently in the recovery phase, so it is possible that the test is simply looking at a marker of halothane hepatitis. Dienstag<sup>202</sup> has pointed out that immune markers have been detected even in cases of liver injury caused by known toxins, *e.g.*, CCl<sub>4</sub>.<sup>203,204</sup> However, this antibody has not been demonstrated in patients uneventfully exposed to multiple halothane anesthetics or in healthy anesthesiologists.<sup>201</sup> Furthermore, it has not been shown in patients in whom hepatic necrosis developed from other causes after incidental halothane anesthesia.<sup>205</sup> This halothane-related antibody has since been detected in other

patients with UHFH.<sup>206,207</sup> In contrast to the biotransformation theory, which emphasizes the reductive pathway of halothane metabolism, the halothane-altered membrane antigen is only produced when the oxidative pathway is activated.<sup>208</sup> As yet, there has been no demonstration of sensitization of patients with UHFH to their own hepatocytes.

The biotransformation and hypersensitivity theories of UHFH are not mutually exclusive: metabolism may be responsible for the production of a hapten capable of provoking an immune response.<sup>120,209</sup> Some authors have suggested that mild hepatic dysfunction may have a toxic (or hypoxic) cause, whereas severe hepatic necrosis might have an additional immune component.<sup>107,120</sup> In support of this, Davis *et al.*<sup>210</sup> were unable to detect antibodies to halothane-sensitized hepatocytes in sera from 16 patients with mild hepatic dysfunction following halothane.

### HYPOXIA

The demonstration that hypoxia is a prerequisite for the development of marked hepatotoxicity in the PB rat model,<sup>51,52,123</sup> and the correlation between hypoxia and reductive metabolism in this model<sup>102,176</sup> and other species,<sup>105,211</sup> led to the hypothesis that enhanced reductive metabolism secondary to hypoxia (with the production of toxic reactive intermediates) might be the cause of halothane hepatotoxicity in humans.<sup>10</sup>

Recently, evidence has accumulated indicating that hypoxia *per se* might be implicated in the PB rat model.<sup>112,114-116</sup> Eger *et al.* have shown that hypoxia in the absence of halothane can cause similar hepatic lesions.<sup>114</sup> High concentrations of halothane for short periods produced more toxicity than low concentrations for prolonged periods,<sup>117</sup> a finding more compatible with liver hypoxia secondary to cardiovascular or respiratory depression. Enflurane and isoflurane, which undergo much less biotransformation than halothane and have no reductive pathway, can produce similar hepatic necrosis in the rat model.<sup>116</sup> Van Dyke<sup>111</sup> also has shown liver damage with enflurane and isoflurane in starved, hypoxic PB rats. Since starvation and hypoxia alone can produce similar damage,<sup>114,212</sup> it is possible that hypoxia itself is the cause in this situation.

Respiratory depression *per se* is unlikely to be responsible for liver hypoxia.<sup>213</sup> However, local liver hypoxia arising from an imbalance between oxygen supply and demand may be relevant. Hyperthyroidism,<sup>126-128</sup> chronic ethanol treatment,<sup>129</sup> and increased body temperature,<sup>214</sup> factors known to increase O<sub>2</sub> consumption, are associated with increased halothane hepatotoxicity in the rat. It is possible that enzyme induction, *e.g.*, with PB, also may act this way.<sup>114</sup> Decreasing hepatic O<sub>2</sub> supply by decreasing perfusion in the isolated rat liver also produces centrilobular necrosis.<sup>215</sup> Harper *et al.*<sup>184</sup> have shown that

ligation of the hepatic artery in the normoxic, PB rat produced comparable lesions to those seen in the PB/hypoxic rat and that upper abdominal surgery is associated with a greater severity of liver damage than lower abdominal or peripheral surgery. Since upper abdominal surgery in humans is associated with a significantly greater decrease in hepatic arterial flow compared with peripheral surgery,<sup>216</sup> this suggests that interference with hepatic blood flow with consequent hepatocellular hypoxia may be important in the production of liver damage. This hypothesis is supported by the work of Gelman *et al.*,<sup>217</sup> showing that liver damage in the PB/hypoxic rat exposed to halothane was correlated with a fall in consumable oxygen. Although celiac plexus block affords no protection in the rat model,<sup>218</sup> suggesting that reflex hepatic artery vasoconstriction is not an important factor, this does not preclude regional intrahepatic alterations in blood flow.

Halothane anesthesia in the dog produces a fall in total liver blood flow paralleling a fall in cardiac output.<sup>219-222</sup> Normally hepatic artery flow is regulated in response to changes in portal venous flow.<sup>223,224</sup> A number of animal studies have shown that, not only is portal venous flow significantly reduced by inhalation anesthesia,<sup>221,222,225</sup> but with halothane hepatic artery flow is also reduced.<sup>222</sup> Recent work in both dogs<sup>226</sup> and rats<sup>227</sup> has shown that, whereas halothane significantly impairs the autoregulation of hepatic artery flow in response to changes in portal venous flow, isoflurane and enflurane produce no such effect. It would seem that an imbalance between hepatic O<sub>2</sub> supply and demand is more likely with halothane than with other agents. Cousins *et al.*<sup>136</sup> showed similar hypotension in the nonhypoxic guinea pig with halothane and isoflurane, but only the halothane group showed liver damage. They argued that this supported a metabolic rather than hypoxic cause for the observed hepatotoxicity. However, an alternative explanation for their findings is that the response of the hepatic circulation to the hypotension was different with the two agents,<sup>226,227</sup> and liver hypoxia still may be a factor in this model.

Although hypoxia *per se* can reduce liver blood flow and produce centrilobular necrosis in humans,<sup>228</sup> the incidence of *primary* liver failure in patients with normal preevent liver function, following recognized frank hypoxia, is excessively rare. More frequently, primary myocardial, cerebral, or renal damage is followed by secondary liver damage, often as a terminal event.<sup>185</sup> Also, fatal hepatic necrosis can follow halothane for minor surgery with no evidence of intraoperative hypoxia or hypotension. Nevertheless, a marked fall in hepatic artery flow has been demonstrated radiographically in humans during halothane anesthesia,<sup>229-230</sup> and one of these patients subsequently had hepatic dysfunction develop.<sup>230</sup> Thus, in addition to the evidence in support of an hypoxic cause for hepatic injury in the PB/hypoxic rat model, there seems to be some evidence to implicate regional hypoxia in the



development of the mild, transient liver dysfunction seen following halothane in humans. However, the fulminant, often-progressive form may involve different or additional etiologic factors.<sup>185</sup>

#### PHARMACOGENETICS

Differences in susceptibility to the toxic effects of halothane have been shown both between species<sup>105</sup> and between different strains of a species.<sup>110</sup> A wide variation in the rate and extent of halothane metabolism also has been shown in humans.<sup>88,147</sup> Cascorbi<sup>231</sup> has demonstrated a decreased variation in halothane metabolism in identical twins compared with fraternal twins, further suggesting a genetic influence. More recently, Hoft *et al.*<sup>232</sup> have presented a review of UHFH in three pairs of closely related women in whom environmental factors were apparently excluded. In a small series, no significant link between UHFH and particular HLA antigens was identified.<sup>233</sup> The evidence seems to indicate that, at most, pharmacogenetic factors are simply one variable in a multifactorial cause.<sup>209,234</sup>

Clearly an interaction of two or more of the factors discussed may be involved in the development of halothane-induced hepatic dysfunction. The mechanisms involved may vary from patient to patient, or they may be different for mild and severe forms of hepatotoxicity.<sup>107,120,185</sup> Metabolites may be implicated as direct toxins or in the production of a harmful immune response or in producing physical effects, *e.g.*, changes in organ perfusion. On the other hand, metabolism may play no role, and any apparent correlation may be masking physiologic effects of the parent compound (combined with surgery).<sup>111</sup>

#### Which Patients Are at Risk?

##### SEX

A number of studies of hepatic damage in humans have shown a female:male ratio of approximately 2:1,<sup>38,39,41,205</sup> although male patients apparently have a worse prognosis.<sup>39,41</sup> In contrast, in the PB/hypoxic rat the female rat is extremely resistant to hepatic necrosis.<sup>123</sup> This has been attributed to different levels of activity in the mixed function oxidase system resulting from the differing effects of androgens and estrogens on this system. This is supported by the lack of a sex difference in prepubertal rats.<sup>103</sup> Also, the different incidence between male and female rats can be reversed by treatment with the opposite sex hormone.<sup>108</sup> Alternatively, this observation may result from a greater degree of enzyme induction in response to PB in the male rat.<sup>235</sup> It seems curious that an opposite sex difference is found in rats and humans if metabolism is the sole etiologic factor in both cases.

##### AGE

An association between posthalothane hepatic dysfunction and middle age has been noted by many authors, whereas it is unusual at the extremes of age.<sup>9</sup>

Severe hepatic dysfunction following halothane is extremely rare in children.<sup>236,237</sup> Isolated cases have been recorded,<sup>238-240</sup> but in a number of these the data were incomplete and open to alternative interpretation. In the most recently reported case<sup>207</sup> the patient was shown to have the halothane-related antibody, already referred to earlier.<sup>200,201</sup> Perhaps children do not have either the metabolic and/or immunologic mechanisms necessary for halothane to cause liver damage.

##### PREEXISTING LIVER DISEASE

There is no evidence that patients with preexisting, compensated liver disease are at any greater risk of having halothane hepatitis develop. However, there is a very strong case for avoiding anesthesia (with or without halothane) and surgery in patients with active hepatitis from any cause unless absolutely essential, since they may undergo a severe deterioration in hepatic function postoperatively, resulting in fulminant hepatic failure.<sup>81</sup>

##### OBESITY

Many reports have indicated an increased incidence of UHFH in obese patients.<sup>39,41,48,49,205</sup> Obesity also appears to be associated with a poor prognosis.<sup>39,41</sup> Young and Stoelting<sup>139</sup> showed increased fluoride levels in obese patients, indicating increased reductive biotransformation, whereas other workers have shown an increase in both reductive (fluoride) and oxidative (bromide) metabolites in the morbidly obese.<sup>241</sup>

An increased fat store may act as a "reservoir" for halothane with prolonged, slow release into the circulation and an increase in total metabolite production.<sup>75</sup> Alternatively, the well-recognized association between obesity and postoperative hypoxemia may offer an explanation, either through enhanced reductive metabolism or liver hypoxia *per se*.<sup>10</sup>

##### TYPE OF SURGERY

Several studies have indicated an increased incidence of UHFH in patients undergoing repeat anesthesia for radium implantation therapy in the treatment of gynecologic malignancy.<sup>32,46,64</sup> Other studies have shown no increased risk with halothane in these patients.<sup>32,34,47,242</sup> Gamma radiation can break down halothane to dichlorohexafluorobutene, but mice exposed to halothane and gamma radiation show no increased incidence of liver damage<sup>243</sup>—although the mouse is not a good model.<sup>151</sup>

No correlation between duration, site, or severity of

surgery, including biliary tract procedures, and UHFH has been shown in humans. In fact, it is a feature of UHFH that it can follow apparently uneventful anesthesia for minor surgery.<sup>205</sup>

#### ENZYME INDUCTION

Despite the enormous volume of data showing hepatic necrosis in the hypoxic, enzyme-induced rat, there is no real evidence implicating preoperative enzyme induction in humans.<sup>244</sup>

#### MULTIPLE EXPOSURE

A number of studies have revealed an increased incidence of UHFH following multiple exposures to halothane. Cumulative data from almost 400 cases revealed a mean incidence of multiple exposure of 84%.<sup>245</sup> Multiple exposures within a short period are associated with an increased frequency of both mild<sup>45,46,48</sup> and severe<sup>37,39,41,205</sup> hepatic dysfunction following halothane. Dysfunction is more severe and latency before presentation is shorter following reexposure.<sup>37,205</sup> Most studies have shown a maximum incidence where reexposure has occurred within 28 days,<sup>37,39,41,205</sup> although cases occasionally may follow reexposure several years after the initial halothane anesthetic.<sup>205</sup> However reexposure in a patient with previous UHFH does not always result in a further episode.<sup>41</sup>

#### Other Inhalation Agents

##### ENFLURANE

A number of case reports of alleged enflurane hepatotoxicity have been published.<sup>246-252</sup> Some patients had histories of previous anesthesia with halothane<sup>247,248,252</sup> or enflurane.<sup>250,251</sup> Lewis *et al.*<sup>13</sup> reviewed 58 such cases reported to the Food and Drug Administration (FDA) and accepted 24 of them on clinical and pathologic grounds as being "enflurane hepatitis." However, Dykes<sup>253</sup> has questioned the validity of this "diagnosis by exclusion." He has indicated that the existence of enflurane hepatotoxicity apparently hinges on a single patient who showed liver damage after each of two enflurane anesthetics.<sup>251</sup> Given the known hepatotoxicity of other inhalation agents, it is not entirely surprising that enflurane was incriminated in many of the reported cases. The difficulties associated with diagnosing viral hepatitis presenting postoperatively are well known. This is illustrated by a case attributing postoperative hepatic dysfunction to enflurane when the true cause was viral infection.<sup>254</sup>

Prospective studies of hepatic function after repeated enflurane anesthesia have shown insignificant<sup>34</sup> or minor changes<sup>48,74</sup> with no evidence of increased disturbance with each exposure.<sup>48</sup>

In May 1984 the Gastroenterology Drug Advisory Committee of the FDA reviewed the available information in the United States of America (USA) which allegedly linked enflurane with postoperative liver damage. This committee came to the conclusion that there was a link between enflurane and liver damage and as a result, Anaquest, the manufacturers of enflurane, have altered their package insert to read as follows: "Unexplained mild, moderate and severe liver injury may rarely follow anesthesia with enflurane. Serum transaminases may be increased and histologic evidence of injury may be found. The histologic changes are neither unique nor consistent. In several of these cases, it has not been possible to exclude enflurane as the cause or as a contributing cause of liver injury. The incidence of unexplained hepatotoxicity following the administration of enflurane is unknown, but it appears to be rare and not dose related." It should be noted that this package insert only applies to the United States and is not included in other countries. Notwithstanding the deliberations of the FDA, we believe that presently the case against enflurane remains unproven,<sup>169,253</sup> and it should continue to be used in any anesthetic where its properties are advantageous to patient well-being.

##### ISOFLURANE

No clinical reports of isoflurane hepatotoxicity have appeared as of yet. McLaughlin and Eger<sup>255</sup> have described a patient given repeated isoflurane anesthetics in the presence of abnormal liver enzyme tests. These were ascribed to ascending cholangitis and passage of a gallstone; isoflurane was not implicated. Indeed liver function improved during the course of the anesthetics. Currently, there seems no reason to avoid the use of isoflurane in any patient for fear of hepatotoxicity.

#### Conclusion

At the outset of this review we asked whether the role of halothane could be defined with regard to patient population and potential risk of hepatotoxicity. We have concluded the following: 1) Halothane may be used repeatedly in children and has a very low-risk potential for liver damage in this group of patients. 2) There is no contraindication to the use of halothane in the presence of preexisting, compensated liver disease, providing this does not relate to a previous anesthetic. Outcome will be determined by the degree of preoperative liver dysfunction and the extent of the surgical procedure. However, if the liver disease is in an acute phase, anesthesia (with any agent) and surgery may be contraindicated.<sup>81</sup> 3) Severe liver damage is unlikely to follow a single exposure to halothane in a previously healthy individual. 4) Repeated exposure to halothane in adult humans, particularly in

obese, middle-aged women and over a short period of time (probably 4–8 weeks),<sup>205</sup> may result in severe liver damage. However, there is no means of predicting this, and the “safe time interval” is unknown; the incidence of UHFH is probably of the order of one in 10,000 anesthetics. It is of interest that this figure is also quoted as the overall risk of death solely as a result of anesthesia, and the incidence of serious neurologic sequelae after epidural anesthesia.<sup>256</sup> 5) If repeated halothane anesthesia is contemplated, the anesthesiologist should document, for medico-legal purposes, on the patient's anesthetic record, the reason for using halothane on the second occasion. In addition, before embarking on the second halothane anesthetic, one should first ascertain, from the patient's records wherever possible, that there were no unexplained detrimental changes in liver function following the first exposure. Should there have been any such problems after the first anesthetic, halothane should not be administered subsequently. 6) The cause of UHFH is unclear. It seems unlikely to be a metabolic mechanism alone and most probably involves an immunologic response in addition. Although in animal models enzyme induction, starvation, hypoxia, and hypotension contribute to halothane-associated liver damage, there is no proof that this is the case in humans. 7) At present there is no test that is specific for halothane-induced liver damage. Therefore, the diagnosis of UHFH may only be made by excluding all other causes of postoperative liver dysfunction.

## References

- Johnstone M: The human cardiovascular response to Fluothane anesthesia. *Br J Anaesth* 28:392–410, 1956
- Burnap TK, Galla SJ, Vandam LD: Anesthetic, circulatory and respiratory effects of Fluothane. *ANESTHESIOLOGY* 19:307–320, 1958
- Virtue RW, Payne KW: Postoperative death after Fluothane. *ANESTHESIOLOGY* 19:562–563, 1958
- Vourc'h G, Schnoebelen E, Buck F, Fruhling L: Hepatonephrite aigue mortelle apres anesthesie comportant de l'halothane (Fluothane). *Anesth Analg* 17:466–473, 1960
- Temple RL, Cole RA, Gorens SW: Massive hepatic necrosis following general anesthesia. *Anesth Analg* 41:586–592, 1962
- Lindenbaum J, Leifer E: Hepatic necrosis associated with halothane anesthesia. *N Engl J Med* 268:525–530, 1963
- Brody GL, Sweet RB: Halothane anesthesia as a possible cause of massive hepatic necrosis. *ANESTHESIOLOGY* 24:29–37, 1963
- Engel HL: Should you use halothane? (correspondence) *ANESTHESIOLOGY* 47:396, 1977
- Strunin L: Postoperative hepatic dysfunction. *The Liver and Anesthesia*. Philadelphia, Saunders, 1977, pp 144–181
- Cousins MJ: Halothane and the liver: “Firm ground” at last? (editorial) *Anaesth Intensive Care* 7:5–8, 1979
- Boulton TB: Editorial. *Anaesthesia* 33:769–771, 1978
- Ezi-Ashi TI, Papworth DP, Nunn JF: Inhalational anaesthesia in developing countries: Part II. Review of existing apparatus. *Anaesthesia* 38:736–747, 1983
- Lewis JH, Zimmerman HJ, Ishak KG, Mullick FG: Enflurane hepatotoxicity. A clinicopathologic study of 24 cases. *Ann Intern Med* 98:984–992, 1983
- Suckling CW: Some chemical and physical factors in the development of Fluothane. *Br J Anaesth* 29:466–472, 1957
- Raventos J: The action of Fluothane—a new volatile anaesthetic. *Br J Pharmacol* 11:394–410, 1956
- Stephen CR, Margolis G, Fabian LW, Bourgeois-Gavardin M: Laboratory observations with Fluothane. *ANESTHESIOLOGY* 19:770–781, 1958
- Krantz JC, Park CS, Triutt EB Jr, Ling ASC: Anesthesia LVII: a further study of the anesthetic properties of 1,1,1-trifluoro-2,2-bromochlorethane (Fluothane). *ANESTHESIOLOGY* 19:38–44, 1958
- Virtue RW, Payne KW, Carranna LJ, Gordon GS, Rember RR: Observations during experimental and clinical use of Fluothane. *ANESTHESIOLOGY* 19:478–487, 1958
- Jones WM, Margolis G, Stephen CR: Hepatotoxicity of inhalation anesthetic drugs. *ANESTHESIOLOGY* 19:715–723, 1958
- Robson JG, Sheridan CA: Preliminary investigations with halothane. *Anesth Analg* 36:62–74, 1957
- Little DM, Barbour CM, Given JB: The effects of Fluothane, cyclopropane and ether anesthetics on liver function. *Surg Gynecol Obstet* 107:712–718, 1958
- Bunker JP, Blumenfeld CM: Liver necrosis after halothane anesthesia. Cause or coincidence? *N Engl J Med* 268:531–534, 1963
- Mushin WW, Rosen M, Bowen DJ, Campbell H: Halothane and liver dysfunction: a retrospective study. *Br Med J* 2:329–341, 1964
- Perry LB, Jenicek JA: Massive hepatic necrosis associated with general anaesthesia. *Milit Med* 129:1148–1151, 1964
- Slater EM, Gibson JM, Dykes MHM, Walzer SG: Postoperative hepatic necrosis. Its incidence and diagnostic value in association with the administration of halothane. *N Engl J Med* 270:983–987, 1964
- Dawson B, Jones RR, Schnelle N, Hartridge VB, Paulson JA, Adson MA, Summerskill WHJ: Halothane and ether anesthesia in gallbladder and bile duct surgery. A retrospective study into mortality and hepatobiliary complications. *Anesth Analg* 42:759–770, 1963
- Allen HL, Metcalfe DW: A search for halothane liver complications. *Anesth Analg* 43:159–162, 1964
- Henderson JC, Gordon RA: The incidence of postoperative jaundice with special reference to halothane. *Can Anaesth Soc J* 11:453–459, 1964
- Dykes MHM, Walzer SG, Slater EM, Gibson JM, Ellis DS: Acute parenchymatous hepatic disease following general anesthesia. Clinical appraisal of hepatotoxicity following administration of halothane. *JAMA* 193:339–344, 1965
- National Halothane Study: A study of the possible association between halothane anesthesia and postoperative hepatic necrosis. Edited by Bunker JP, Forrest WH, Mosteller F, Vandam LD. Washington, D. C., U. S. Government Printing Office, 1969
- Hughes M, Powell LW: Recurrent hepatitis in patients receiving multiple halothane anesthetics for radium treatment of carcinoma of the cervix uteri. *Gastroenterology* 58:790–797, 1970
- Samrah ME: Liver damage after halothane. (letter) *Br Med J* 1:1736–1737, 1963
- Simpson BR, Strunin L, Walton B: The halothane dilemma: A case for the defence. *Br Med J* 4:96–100, 1971
- Allen PJ, Downing JW: A prospective study of hepatocellular function after repeated exposures to halothane or enflurane in women undergoing radium therapy for cervical cancer. *Br J Anaesth* 49:1035–1039, 1977
- Simpson BR, Strunin L, Walton B: Evidence for halothane hepatotoxicity is equivocal. Controversy in Internal Medicine II.

- Edited by Ingelfinger FJ, Ebert RV, Finland M, Relman AS. Philadelphia, W. B. Saunders, 1974, pp 580-594
36. Schaffner F: Halothane Hepatitis. Controversy in Internal Medicine II. Edited by Ingelfinger FJ, Ebert RV, Finland M, Relman AS. Philadelphia, W. B. Saunders, 1974, pp 565-579
37. Inman WHW, Mushin WW: Jaundice after repeated exposure to halothane: An analysis of reports to the Committee on Safety of Medicines. *Br Med J* 1:5-10, 1974
38. Bottinger LE, Dalen E, Hallen B: Halothane-induced liver damage: An analysis of the material reported to the Swedish Adverse Drug Reaction Committee 1966-1973. *Acta Anaesthesiol Scand* 20:40-46, 1976
39. Moul PJA, Sherlock S: Halothane related hepatitis. A clinical study of 26 cases. *Q J Med* 44:99-114, 1975
40. Dossing M, Andreassen BP: Drug-induced liver disease in Denmark. An analysis of 572 cases of hepatotoxicity reported to the Danish Board of Adverse Reactions to Drugs. *Scand J Gastroenterol* 17:205-211, 1982
41. Walton B, Simpson BR, Strunin L, Doniach D, Perrin J, Appleyard AJ: Unexplained hepatitis following halothane. *Br Med J* 1:1171-1176, 1976
42. Klatskin G, Kimberg DV: Recurrent hepatitis attributable to halothane sensitization in an anesthetist. *N Engl J Med* 280:515-522, 1969
43. Paronetto F, Popper H: Lymphocyte stimulation induced by halothane in patients with hepatitis following exposure to halothane. *N Engl J Med* 283:277-280, 1970
44. Little DM: Effects of halothane on hepatic function, *Clinical Anesthesia*. Halothane. Edited by Greene NM. Philadelphia, FA Davis, 1968
45. Wright R, Chisholm M, Lloyd B, Edwards JC, Eade OE, Hawksley M, Moles TM, Gardner MJ: Controlled prospective study of the effect on liver function of multiple exposure to halothane. *Lancet* 1:814-820, 1975
46. Trowell J, Peto R, Crampton-Smith A: Controlled trial of repeated halothane anaesthetics in patients with carcinoma of the uterine cervix treated with radium. *Lancet* i:821-824, 1975
47. McEwan J: Liver function tests following anaesthesia. *Br J Anaesth* 48:1065-1070, 1976
48. Fee JPH, Black GW, Dundee JW, McIlroy PDA, Johnston HML, Johnston SB, Black IHC, McNeill HG, Neill DW, Doggart JR, Merrett JD, McDonald JR, Bradley DSG, Haire M, McMillan SA: A prospective study of liver enzyme and other changes following repeat administration of halothane and enflurane. *Br J Anaesth* 51:1133-1141, 1979
49. Dundee JW: Problems of multiple inhalation anaesthetics. *Br J Anaesth* 53:63S-67S, 1981
50. Sipes IG, Brown BR Jr: An animal model of hepatotoxicity associated with halothane anesthesia. *ANESTHESIOLOGY* 45:622-628, 1976
51. Ross WT, Daggy BP, Cardell RR Jr: Hepatic necrosis caused by halothane and hypoxia in phenobarbital-treated rats. *ANESTHESIOLOGY* 51:327-333, 1979
52. McLain GE, Sipes IG, Brown BR Jr: An animal model of halothane hepatotoxicity: Roles of enzyme induction and hypoxia. *ANESTHESIOLOGY* 51:321-326, 1979
53. Tornetta FJ, Tamaki HT: Halothane jaundice and hepatotoxicity. *JAMA* 184:658-660, 1963
54. Herber R, Specht NW: Liver necrosis following anesthesia. *Arch Intern Med* 115:266-272, 1965
55. Morgenstern L, Sacks HJ, Marmer MJ: Post-operative jaundice with halothane anesthesia. *Surg Gynecol Obstet* 121:728-732, 1965
56. Klion FM, Schaffner F, Popper H: Hepatitis after exposure to halothane. *Ann Intern Med* 71:467-477, 1969
57. Quizilbash AH: Halothane hepatitis. *Can Med Assoc J* 108:171-177, 1973
58. Peters RL, Edmondson HA, Reynolds TB, Meister JC, Curphey TJ: Hepatic necrosis associated with halothane anesthesia. *Am J Med* 47:748-764, 1969
59. Blackburn WR, Ngai SH, Lindenbaum J: Morphologic changes in hepatic necrosis following halothane anesthesia in man. *ANESTHESIOLOGY* 25:270-283, 1964
60. Dordal E, Glagov S, Orlando RA, Platz C: Fatal halothane hepatitis with transient granulomas. *N Engl J Med* 283:357-359, 1970
61. Hansen V: Liver necrosis after repeated Fluothane anaesthesia. Cause or coincidence? *Acta Anaesthesiol Scand* 14:1-3, 1970
62. Dykes MHM, Bunker JP: Hepatotoxicity and anesthetics. *Pharmacology for Physicians* 4:15-18, 1970
63. Uzunlimoglu B, Yardley JH, Boitnott JK: The liver in mild halothane hepatitis: Light and electron microscopic findings with special reference to the mononuclear cell infiltrate. *Am J Pathol* 61:457-478, 1970
64. Davis P, Holdsworth CD: Jaundice after multiple halothane anaesthetics administered during the treatment of carcinoma of the uterus. *Gut* 14:566-568, 1973
65. Davis JS: Halothane anesthesia followed by anicteric hepatitis with complete recovery. *NY State J Med* 74:1042-1044, 1974
66. Paull A, Grant AK: Halothane hepatitis—a report of five cases. *Med J Aust* 1:954-957, 1974
67. Bianchi L, De Groote J, Desmet V, Gedigk P, Korb G, Popper H, Poulsen H, Scheuer PJ, Schmid M, Thaler H, Wepler W: Guidelines for diagnosis of therapeutic drug-induced liver injury in liver biopsies (review by an international group). *Lancet* 1:854-857, 1974
68. Wills EJ, Walton B: A morphologic study of unexplained hepatitis following halothane anesthesia. *Am J Pathol* 91:11-32, 1978
69. Schatzki PF, Kay S, McGavic JD: Ultrastructural pathology of a case of halothane hepatitis. *Am J Dig Dis* 18:905-911, 1973
70. Sindelar WF, Tralka TS, Gibbs PS: Evidence for acute cellular changes in human hepatocytes during anesthesia with halogenated agents: an electron microscopic study. *Surgery* 92:520-527, 1982
71. Miller DJ, Dwyer J, Klatskin G: Halothane hepatitis: benign resolution of a severe lesion. *Ann Intern Med* 89:212-215, 1978
72. Schlippert W, Anuras S: Recurrent hepatitis following halothane exposures. *Am J Med* 65:25-30, 1978
73. Thomas FB: Chronic aggressive hepatitis induced by halothane. *Ann Intern Med* 81:487-489, 1974
74. Thompson DS, Friday CD: Changes in liver enzyme values after halothane and enflurane for surgical anesthesia. *South Med J* 71:779-782, 1978
75. Cousins MJ: Halothane hepatitis: What's new? *Drugs* 19:1-6, 1980
76. Strunin L: Liver dysfunction after repeated anaesthesia. (editorial). *Br J Anaesth* 51:1097-1099, 1979
77. Nimmo WS: Drug reactions and the liver (editorial). *Br J Anaesth* 52:1059-1060, 1980
78. Schemel WH: Unexpected hepatic dysfunction found by multiple laboratory screening. *Anesth Analg* 45:810-812, 1976
79. Peters RL: Halothane hepatitis (letter). *Lancet* 2:790-791, 1978
80. Strunin L: Halothane hepatitis (letter). *Lancet* 2:791, 1978
81. Powell-Jackson P, Greenway B, Williams R: Adverse effects of exploratory laparotomy in patients with suspected liver disease. *Br J Surg* 68:449-451, 1982
82. Johnstone M: Halothane hepatitis (letter). *Lancet* 2:526, 1978
83. Belfrage S, Alhgren J, Axelsson S: Halothane hepatitis in an anaesthetist (letter). *Lancet* 2:1466-1477, 1966
84. Johnston CI, Mendelsohn F: Halothane hepatitis in a laboratory technician. *Aust NZ J Med* 1:171-173, 1971

85. Lund I, Skulberg A, Helle I: Occupational hazard of halothane (letter). *Lancet* 2:528-529, 1974
86. Dykes MHM: Is halothane hepatitis chronic active hepatitis? (editorial). *ANESTHESIOLOGY* 46:233-235, 1977
87. Neuberger J, Vergani D, Mieli-Vergani G, Davis M, Williams R: Hepatic damage after exposure to halothane in medical personnel. *Br J Anaesth* 53:1173-1177, 1981
88. Cascorbi HK, Blake DA, Helrich M: Differences in the biotransformation of halothane in man. *ANESTHESIOLOGY* 32:119-123, 1970
89. Rehder K, Forbes J, Alter H, Hessler O, Stier A: Halothane biotransformation in man: A quantitative study. *ANESTHESIOLOGY* 28:711-715, 1967
90. Cohen EN, Brown BW Jr, Bruce DL, Cascorbi HF, Corbett TH, Jones TW, Whitcher CE: Occupational disease among operating room personnel: A national study. *ANESTHESIOLOGY* 41:321-340, 1974
91. Cohen EN, Brown BW Jr, Bruce DL, Cascorbi HF, Corbett TH, Jones TW, Whitcher CE: A survey of anesthetic health hazards among dentists. *J Am Dent Assoc* 90:1291-1296, 1975
92. Fleming SA, Bearcroft WGC: The effect of repeated administration of halothane on the livers of healthy monkeys. *Can Anaesth Soc J* 13:247-251, 1966
93. Clauberg G: Untersuchungen über den Einfluss von Inhalationssnarkose und Operation auf die Leberfunktion unter besonderer Berücksichtigung des Halothans. *Anaesthetist* 19:387-392, 1970
94. Davies DC, Schroeder DH, Gram TE, Reagan RL, Gillette JR: A comparison of the effects of halothane and  $\text{CCl}_4$  on the hepatic drug metabolising system. *J Pharmacol Exp Ther* 177:556-566, 1971
95. Stenger RJ, Johnson EA: Effects of phenobarbital pretreatment on the response of rat liver to halothane administration. *Proc Soc Exp Biol Med* 140:1319-1324, 1972
96. Hughes C Jr, Lang CM: Hepatic necrosis produced by repeated administration of halothane to guinea-pigs. *ANESTHESIOLOGY* 36:466-471, 1972
97. Reves JG, McCracken LE: Halothane in the guinea pig (correspondence). *ANESTHESIOLOGY* 42:230-231, 1975
98. Van Dyke RA, Chenoweth MB, Van Poznak A: Metabolism of volatile anesthetics. I. Conversion in vivo of several anesthetics to  $^{14}\text{CO}_2$  and chloride. *Biochem Pharmacol* 13:1239-1247, 1964
99. Van Dyke RA, Chenoweth MB: The metabolism of volatile anesthetics. II. In vitro metabolism of methoxyflurane and halothane in rat liver slices and cell fractions. *Biochem Pharmacol* 14:603-609, 1965
100. Van Dyke RA: Metabolism of volatile anesthetics. III. Induction of microsomal dechlorinating and ether-cleaving enzymes. *J Pharmacol Exp Ther* 154:364-369, 1966
101. Brown BR, Sipes IG: Commentary. Biotransformation and hepatotoxicity of halothane. *Biochem Pharmacol* 26:2091-2094, 1977
102. Cousins MJ, Sharp JH, Gourlay GK, Adams JF, Haynes WD, Whitehead R: Hepatotoxicity and halothane metabolism in an animal model with application for human toxicity. *Anaesth Intensive Care* 7:9-24, 1979
103. Cohen EN, Van Dyke RA: Metabolism of volatile anesthetics. Reading, Addison-Wesley, 1977, pp 53, 90-94
104. Hitt BA, Mazze RI, Stevens WC, White A, Eger EI II: Species, strain, sex and individual differences in enflurane metabolism. *Br J Anaesth* 47:1157-1161, 1975
105. Gorsky BH, Cascorbi HF: Halothane hepatotoxicity and fluoride production in mice and rats. *ANESTHESIOLOGY* 50:123-125, 1979
106. Bell LE, Hitt BA, Mazze RI: The influence of age on the distribution, metabolism and excretion of methoxyflurane in Fischer 344 rats: a possible relationship to nephrotoxicity. *J Pharmacol Exp Ther* 195:34-40, 1975
107. Brown BR Jr: Halogenated analgesics and hepatotoxicity. *S Afr Med J* 59:422-424, 1981
108. Cascorbi HF, Gorsky BH, Redford JE: Sex differences in anesthetic toxicity: Fluroxene and trifluoroethanol in mice. *Br J Anaesth* 48:399-402, 1976
109. Mazze RI, Cousins MJ, Kosek JC: Strain differences in metabolism and susceptibility to the nephrotoxic effects of methoxyflurane in rats. *J Pharmacol Exp Ther* 184:481-488, 1973
110. Gourlay GK, Adams JF, Cousins MJ, Hall P: Genetic differences in reductive metabolism and hepatotoxicity of halothane in 3 rat strains. *ANESTHESIOLOGY* 55:96-103, 1981
111. Van Dyke RA: Hepatic centrilobular necrosis in rats after exposure to halothane, enflurane, or isoflurane. *Anesth Analg* 61:812-819, 1982
112. Shingu K, Eger EI II, Johnson BH, Van Dyke RA, Lurz FW, Cheng A: Effect of oxygen concentration, hyperthermia and choice of vendor on anesthetic-induced hepatic injury in rats. *Anesth Analg* 62:146-150, 1983
113. Strunin L, Harrison LJ, Davies JM: Etiology of halothane hepatotoxicity (correspondence). *ANESTHESIOLOGY* 58:391, 1983
114. Shingu K, Eger EI II, Johnson BH: Hypoxia per se can produce hepatic damage without death in rats. *Anesth Analg* 61:820-823, 1982
115. Van Dyke RA: Effect of fasting on anesthetic-associated liver toxicity (abstract). *ANESTHESIOLOGY* 55:A181, 1981
116. Shingu K, Eger EI II, Johnson BH, Van Dyke RA, Lurz FW, Harper MH, Cheng A: Hepatic injury induced by anesthetic agents in rats. *Anesth Analg* 62:140-145, 1983
117. Shingu K, Eger EI II, Johnson BH: Hypoxia may be more important than reductive metabolism in halothane-induced hepatic injury. *Anesth Analg* 61:824-827, 1982
118. Sawyer DC, Eger EI III, Balham SH, Cullen BF, Impelman D: Concentration dependence of hepatic halothane metabolism. *ANESTHESIOLOGY* 34:230-235, 1971
119. Cahalan MK, Johnson BH, Eger EI II, Sheiner LB, Richardson CA, Varner JK, Severinghaus JW: A noninvasive in vivo method of assessing the kinetics of halothane metabolism in humans. *ANESTHESIOLOGY* 57:298-302, 1982
120. Pohl LR, Gillette JR: A perspective on halothane-induced hepatotoxicity (editorial). *Anesth Analg* 61:809-811, 1982
121. Plummer JL, Beckwith ALJ, Bastin FN, Adams JF, Cousins MJ, Hall P: Free radical formation in vivo and hepatotoxicity due to anesthesia with halothane. *ANESTHESIOLOGY* 57:160-166, 1982
122. Brown BR Jr, Gandolfi AJ, Lind RC, Sipes IG: Conflicting mechanisms of hepatic injury with halothane and enflurane (abstract). *ANESTHESIOLOGY* 61:A270, 1984
123. Jee RC, Sipes IG, Gandolfi AJ, Brown BR Jr: Factors influencing halothane hepatotoxicity in the rat hypoxic model. *Toxicol App. Pharmacol* 52:267-277, 1980
124. Eade OE, Millward-Sadler GH, Lucas K, Mitchell J, Wright R: Hepatic necrosis in rats following halothane administration: Protective effect of diethyldithiocarbamate. *Scand J Gastroenterol* 5:859-864, 1980
125. Reynolds ES, Moslen MT: Liver injury following halothane anesthesia in phenobarbital-pretreated rats. *Biochem Pharmacol* 23:189-195, 1974
126. Wood M, Berman ML, Harbison RD, Hoyle P, Phythyton JM, Wood AJJ: Halothane-induced hepatic necrosis in triiodothyronine-pretreated rats. *ANESTHESIOLOGY* 52:470-476, 1980
127. Siegers CP, Fruhling A, Younes M: Halothane hepatotoxicity in hyperthyroid rats as compared to the phenobarbital-hypoxia model. *Toxicol Appl Pharmacol* 69:257-264, 1983

128. Smith AC, Berman ML, James RC, Harbison RD: Characterisation of hyperthyroidism enhancement of halothane-induced hepatotoxicity. *Biochem Pharmacol* 32:3531-3539, 1983
129. Tagaki T, Ishii J, Takahashi H, Kato S, Okuno F, Ebihara Y, Yamauchi H, Nagata S, Tashiro M, Tsuchiya M: Potentiation of halothane hepatotoxicity by chronic ethanol administration in rat: An animal model of halothane hepatitis. *Pharmacol Biochem Behav* 18(suppl 1):461-465, 1983
130. Berman ML, Kuhnert L, Phythyton JM, Holaday DA: Isoflurane and enflurane-induced hepatic necrosis in triiodothyronine-pretreated rats. *ANESTHESIOLOGY* 58:1-5, 1983
131. Siegers CP, Mackenroth T, Wachter S, Younes M: Effects of thyroid dysfunction on the metabolism of halothane, enflurane and methoxyflurane in rats. *Pharmacology* 22:41-46, 1981
132. Calvert DN, Brody TM: The effect of thyroid function upon carbon tetrachloride hepatotoxicity. *J Pharmacol Exp Ther* 134:304-310, 1961
133. Raheja KL, Linscheer WG, Cho C, Mahany D: Protective effect of propylthiouracil independent of its hypothyroid effect on acetaminophen toxicity in the rat. *J Pharmacol Exp Ther* 220:427-432, 1982
134. Israel Y, Orego H, Khanna JM, Stewart DJ, Phillips MJ, Kalant H: Alcohol induced susceptibility to hypoxic liver damage: Possible role in the pathogenesis of alcoholic liver disease? Alcohol and the liver. Edited by Fisher MM, Rankin JG. New York, Plenum Press, 1977 pp 323-346
135. Lunam CA, Hall P de la M, Cousins MJ: Halothane hepatitis in a guinea-pig model in the absence of enzyme induction or hypoxia (abstract). *Clin Exp Pharmacol Physiol* 9:469-470, 1982
136. Lunam CA, Hall P de la M, Cousins MJ: Cardiovascular and hepatic effects of halothane and isoflurane in a guinea-pig model of "halothane hepatitis" (abstract). *Clin Exp Pharmacol Physiol* 10:726, 1983
137. Paul BB, Rubinstein D: Metabolism of carbon tetrachloride and chloroform by the rat. *J Pharmacol Exp Ther* 141:141-148, 1963
138. Stier A, Alter H, Hessler O, Rehder K: Urinary excretion of bromide in halothane anesthesia. *Anesth Analg* 43:723-728, 1964
139. Young SR, Stoelting RK, Peterson C, Madura JA: Anesthetic biotransformation and renal function in obese patients during and after methoxyflurane or halothane anesthesia. *ANESTHESIOLOGY* 42:451-457, 1975
140. Stier A, Kunz HW, Walli AK, Schimassek H: Effects on growth and metabolism of rat liver by halothane and its metabolite trifluoroacetate. *Biochem Pharmacol* 21:2181-2192, 1972
141. Blake DA, Cascorbi HF, Rozman RS, Meyer FJ: Animal toxicity of 2,2,2-trifluoroethanol. *Toxicol Appl Pharmacol* 15:83-91, 1969
142. Reves JG, McCracken LE Jr: Failure to induce hepatic pathology in animals sensitised to a halothane metabolite and subsequently challenged with halothane. *Anesth Analg* 55:235-242, 1976
143. Rosenberg PH, Wahlstrom T: Hepatotoxicity of halothane metabolites in vivo and inhibition of fibroblast growth in vitro. *Acta Pharmacol Toxicol* 29:9-19, 1971
144. Cohen EN: Metabolism of volatile anesthetics. *ANESTHESIOLOGY* 35:193-202, 1971
145. Johnstone RE, Kennell EM, Behar MG, Brummond W Jr, Ebersole RC, Shaw LM: Increased serum bromide concentration after halothane anesthesia in man. *ANESTHESIOLOGY* 42:598-601, 1975
146. Atallah MM, Geddes IC: Metabolism of halothane during and after anaesthesia in man. *Br J Anaesth* 45:464-470, 1973
147. Tinker JH, Gandolfi AJ, Van Dyke RA: Elevation of plasma bromide levels in patients following halothane anesthesia: Time correlation with total halothane dosage. *ANESTHESIOLOGY* 44:194-196, 1976
148. Cohen EN: Metabolism of halothane-2-<sup>14</sup>C in the mouse. *ANESTHESIOLOGY* 31:560-565, 1969
149. Cohen EN, Hood N: Application of low-temperature autoradiography to studies of the uptake and metabolism of volatile anesthetics in the mouse III. Halothane. *ANESTHESIOLOGY* 31:553-559, 1969
150. Linde HW, Berman ML: Non-specific stimulation of drug-metabolizing enzymes by inhalation anesthetic agents. *Anesth Analg* 50:656-665, 1971
151. Stoyka WW, Havasi G: The effects of repeated <sup>14</sup>C halothane exposure in mice. *Can Anaesth Soc J* 24:243-251, 1977
152. Topham JC, Longshaw S: Studies with halothane: I. The distribution and excretion of halothane metabolites in animals. *ANESTHESIOLOGY* 37:311-323, 1972
153. Reynolds ES, Moslen MT: Metabolism of (<sup>14</sup>C-1)-halothane in vivo—effects of multiple halothane anesthesia, phenobarbital and carbon tetrachloride pretreatment. *Biochem Pharmacol* 24:2075-2081, 1975
154. Stevens WC, Eger EI II, White A, Halsey MJ, Munger W, Gibbons RD, Dolan W, Shargel R: Comparative toxicities of halothane, isoflurane and diethylether at subanesthetic concentrations in laboratory animals. *ANESTHESIOLOGY* 42:408-419, 1975
155. Uehleke H, Hellmer KH, Tabarelli-Poplawski S: Metabolic activation of halothane and its covalent binding to liver endoplasmic proteins in vitro. *Naunyn Schmiedeberg Arch Pharmacol* 279:39-52, 1973
156. Van Dyke RA: Biotransformation of volatile anaesthetics with special emphasis on the role of metabolism in the toxicity of anaesthetics. *Can Anaesth Soc J* 20:21-33, 1973
157. Van Dyke RA, Gandolfi A: Anaerobic release of fluoride from halothane: relationship to the binding of halothane metabolites to hepatic cellular constituents. *Drug Metab Dispos* 4:40-44, 1976
158. Van Dyke RA, Wood CL: Binding of radioactivity from <sup>14</sup>C-labeled halothane in isolated perfused rat livers. *ANESTHESIOLOGY* 38:328-332, 1973
159. Gandolfi AJ, White RD, Sipes IG, Pohl LR: Bioactivation and covalent binding of halothane in vitro: studies with (<sup>3</sup>H)- and (<sup>14</sup>C)-Halothane. *J Pharmacol Exp Ther* 214:721-725, 1980
160. Van Dyke RA, Wood CL: In vitro studies on irreversible binding of halothane metabolites to microsomes. *Drug Metab Dispos* 3:51-57, 1975
161. Wood CL, Gandolfi AJ, Van Dyke RA: Lipid binding of a halothane metabolite: relationship to lipid peroxidation in vitro. *Drug Metab Dispos* 4:305-313, 1976
162. Widger LA, Gandolfi AJ, Van Dyke RA: Hypoxia and halothane metabolism in vivo: Release of inorganic fluoride and halothane metabolite binding to cellular constituents. *ANESTHESIOLOGY* 44:197-201, 1976
163. Wood M, Uetrecht J, Phythyton JM, Wood AJJ: Cimetidine protects against halothane-induced hepatotoxicity (abstract). *ANESTHESIOLOGY* 57:A221, 1982
164. Plummer JL, Wanwimolruk S, Jenner MA, Hall P de la M, Cousins MJ: Effects of cimetidine and ranitidine on halothane metabolism and hepatotoxicity in an animal model. *Drug Metab Dispos* 12:106-110, 1984
165. Wood M, Uetrecht J, Sweetman B, Wood AJJ: Effect of cimetidine on the oxidative metabolism of halothane (abstract). *ANESTHESIOLOGY* 61:A269, 1984
166. Cohen EN, Trudell JR, Edmunds HN, Watson E: Urinary metabolites of halothane in man. *ANESTHESIOLOGY* 43:392-401, 1975
167. Ullrich V, Schnabel KH: Formation and binding of carbanions

- by cytochrome P-450 of liver microsomes. *Drug Metab Dispos* 1:176-182, 1973
168. Sharp JH, Trudell JR, Cohen EN: Volatile metabolites and decomposition products of halothane in man. *ANESTHESIOLOGY* 50:2-8, 1979
  169. Plummer JL, Cousins MJ, Hall P de la M: Volatile anaesthetic metabolism and acute toxicity. *Q Rev Drug Metab Interact* 4: 50-98, 1982
  170. Raventos J, Lemon PG: The impurities in Fluothane: Their biological properties. *Br J Anaesth* 37:716-737, 1965
  171. Van Dyke RA, Gandolfi AJ: Studies on irreversible binding of radioactivity from (<sup>14</sup>C)halothane to rat hepatic microsomal lipids and protein. *Drug Metab Dispos* 2:469-476, 1974
  172. Sipes IG, Gandolfi AJ, Pohl LR, Krishna G, Brown BR Jr: Comparison of the biotransformation and hepatotoxicity of halothane and deuterated halothane. *J Pharmacol Exp Ther* 214: 716-720, 1980
  173. Mukai S, Morio M, Fujii K, Hanaki C: Volatile metabolites of halothane in the rabbit. *ANESTHESIOLOGY* 47:248-251, 1977
  174. Gourlay GK, Adams JF, Cousins MJ, Sharp JH: Time course of formation of volatile reductive metabolites of halothane in humans and animal model. *Br J Anaesth* 52:331-336, 1980
  175. Cascorbi HF: Factors causing differences in halothane biotransformation. *Int Anesthesiol Clin* 12:63-71, 1974
  176. Maiorino RM, Sipes IG, Gandolfi AJ, Brown BR Jr, Lind RC: Factors affecting the formation of chlorotrifluoroethane and chlorodifluoroethylene from halothane. *ANESTHESIOLOGY* 54: 383-389, 1981
  177. Brown BR Jr, Sipes IG, Baker RK: Halothane hepatotoxicity and the reduced derivative, 1,1,1-trifluoro-2-chloroethane. *Environ Health Perspect* 21:185-188, 1977
  178. Recknagel RO, Ghoshal AK: Lipoperoxidation as a vector in carbon tetrachloride hepatotoxicity. *Lab Invest* 15:132-146, 1966
  179. Massion WH, Poyer JL, Downs P, Fagraeus L: Comparative study of halogenated hydrocarbon toxicity and free radical formation in rat liver (abstract). *ANESTHESIOLOGY* 61:A274, 1984
  180. Brown BR Jr: Hepatic microsomal lipoperoxidation and inhalation anesthetics: A biochemical and morphologic study in the rat. *ANESTHESIOLOGY* 36:458-465, 1972
  181. Holaday DA: Absorption, biotransformation, and storage of halothane. *Environ Health Perspect* 21:165-169, 1977
  182. Knights KM, Gourlay GK, Gibson RA, Cousins MJ: Halothane and carbon tetrachloride induced hepatic necrosis in rats: the role of lipid peroxidation in vivo (abstract). *Clin Exp Pharmacol Physiol (Suppl)* 8:106-107, 1984
  183. Eger EI II: Dragons and other scientific hazards (editorial). *ANESTHESIOLOGY* 50:1, 1979
  184. Harper MH, Collins P, Johnson BH, Eger EI II, Biava CG: Post-anesthetic hepatic injury in rats: Influence of alterations in hepatic blood flow, surgery, and anesthesia time. *Anesth Analg* 61:79-82, 1982
  185. Strunin L, Davies JM, Corral IMC: A perspective on halothane-induced hepatotoxicity (letter). *Anesth Analg* 63:540-541, 1983
  186. Doniach *Engl J Med* 283:315-316, 1970
  187. Sharpstone P, Medley DRK, Williams R: Halothane hepatitis—a preventable disease? *Br Med J* 1:448-450, 1971
  188. Carney FMT, Van Dyke RA: Halothane hepatitis: a critical review. *Anesth Analg* 51:135-160, 1972
  189. Rodriguez M, Paronetto F, Schaffner F, Popper H: Anti-mitochondrial antibodies in jaundice following drug administration. *JAMA* 208:148-150, 1969
  190. Dykes MHM: Unexplained postoperative fever: Its value as a sign of halothane sensitization. *JAMA* 216:641-644, 1971
  191. Walton BW, Dumonde DC, Williams C, Jones D, Strunin JM, Layton JM, Strunin L, Simpson R: Lymphocyte transformation: Absence of increased responses in alleged halothane jaundice. *JAMA* 225:494-498, 1973
  192. Moulton PJA, Adjuikiewicz AB, Gaylarde PM, Sarkany I, Sherlock S: Lymphocyte transformation in halothane-related hepatitis. *Br Med J* 2:69-70, 1975
  193. Jones Williams W, Pioli E, Horton JN, Waldron A: M.I.F. test in halothane jaundice (letter). *Br Med J* 4:47, 1972
  194. Price CD, Gibbs AR, Jones Williams W: Halothane macrophage inhibition factor test in halothane-associated hepatitis. *J Clin Pathol* 30:312-316, 1977
  195. Nunez-Gornes JF, Marx JJ Jr, Motszko C: Leucocyte migration inhibition in halothane-induced hepatitis. *Clin Immunol Immunopathol* 14:30-34, 1979
  196. Mathieu A, DiPadua D, Kahan BD, Galdabini JJ, Mills J: Correlation between specific immunity to a metabolite of halothane and hepatic lesions after multiple exposures. *Anesth Analg* 54: 332-339, 1975
  197. Mathieu A, DiPadua D, Mills J, Kahan B: Experimental immunity to a metabolite of halothane and fluorene: Cutaneous delayed-type hypersensitivity. *ANESTHESIOLOGY* 40:385-390, 1974
  198. Walton B, Hamblin A, Dumonde DC, Simpson R: Absence of cellular hypersensitivity in patients with unexplained hepatitis following halothane. *ANESTHESIOLOGY* 44:391-397, 1976
  199. Ford DJ, Coyle DE, Harrington JF: Effects of hypersensitivity to a halothane metabolite on halothane-induced liver damage. *ANESTHESIOLOGY* 60:141-143, 1984
  200. Vergani D, Tsantoulas D, Eddleston ALWF, Davis M, Williams R: Sensitisation to halothane-altered liver components in severe hepatic necrosis after halothane anaesthesia. *Lancet* 2:801-803, 1978
  201. Vergani D, Mieli-Vergani G, Alberti A, Neuberger J, Eddleston ALWF, Davis M, Williams R: Antibodies to the surface of halothane-altered rabbit hepatocytes in patients with severe halothane-associated hepatitis. *N Engl J Med* 303:66-71, 1980
  202. Dienstag JL: Halothane hepatitis: allergy or idiosyncrasy? (editorial) *N Engl J Med* 303:102-104, 1980
  203. Smith CI, Cooksley WGE, Powell LW: Cell mediated immunity to liver antigen in toxic liver injury. 1. Occurrence and specificity. *Clin Exp Immunol* 39:607-617, 1980
  204. Smith CI, Cooksley WGE, Powell LW: Cell mediated immunity to liver antigen in toxic liver injury. 2. Role in pathogenesis of liver damage. *Clin Exp Immunol* 39:618-625, 1980
  205. Neuberger J, Williams R: Halothane anaesthesia and liver damage. *Br Med J* 289:1136-1139, 1984
  206. Neuberger J, Vergani D, Mieli-Vergani G, Davis M, Williams R: Hepatic damage after exposure to halothane in medical personnel. *Br J Anaesth* 53:1173-1177, 1981
  207. Lewis RB, Blair M: Halothane hepatitis in a young child. *Br J Anaesth* 54:349-354, 1982
  208. Neuberger J, Mieli-Vergani G, Tredger JM, Davis M, Williams R: Oxidative metabolism of halothane in the production of altered hepatocyte membrane antigens in acute halothane-induced necrosis. *Gut* 22:669-672, 1981
  209. Brown BR Jr: Pharmacogenetics and the halothane hepatitis mystery (editorial). *ANESTHESIOLOGY* 55:93-94, 1981
  210. Davis M, Eddleston ALWF, Neuberger JM, Vergani D, Mieli-Vergani G, Williams R: Halothane hepatitis (letter). *N Engl J Med* 303:1123, 1980
  211. Andreen M, Irestedt L: Hepatic release of fluoride from halothane under hypoxic and non-hypoxic conditions in the dog. *Acta Anaesthesiol Scand* 22:519-526, 1978
  212. Fassoulaki A, Eger EI II, Johnson BH, Ferrell LD, Smuckler EA, Harper MH, Eger RR, Cahalan MK: Brief periods of hypoxia can produce hepatic injury in rats. *Anesth Analg* 63:885-887, 1984

213. Shingu K, Eger EI II, Johnson BH, Lurz FW, Taber V: Effects of halothane, isoflurane, enflurane, thiopental, and fentanyl on blood gas values in rats exposed to hypoxia. *Anesth Analg* 62:155-159, 1983
214. Ford D, Coyle DE: Effect of body temperature on the halothane-hypoxia-induction model of halothane hepatitis (abstract). *ANESTHESIOLOGY* 59:A222, 1983
215. Lemasters JJ, Ji S, Thurman RG: Centrilobular injury following hypoxia in isolated, perfused rat liver. *Science* 213:661-663, 1981
216. Gelman SI: Disturbances in hepatic blood flow during anesthesia and surgery. *Arch Surg* 111:881-883, 1976
217. Gelman S, Rimerman V, Fowler K, Bishop S: Consumable oxygen in halothane and isoflurane induced hepatotoxicity model in rats (abstract). *ANESTHESIOLOGY* 59:A221, 1983
218. Harper MH, Johnson BH, Eger EI II: Celiac plexus block does not alter hepatic injury in rats. *Anesth Analg* 63:479-481, 1984
219. Ahlgren I, Aronsen KF, Ericsson B, Fajgelj A: Hepatic blood flow during different depths of halothane anesthesia in the dog. *Acta Anaesthesiol Scand* 11:91-96, 1967
220. Juhl B, Einer-Jensen N: Hepatic blood flow and cardiac output during halothane anaesthesia: An animal study. *Acta Anaesthesiol Scand* 18:114-122, 1974
221. Thulin L, Andreen M, Irestedt L: Effect of controlled halothane anaesthesia on splanchnic blood flow and cardiac output in the dog. *Acta Anaesthesiol Scand* 19:146-153, 1975
222. Hughes RL, Campbell D, Fitch W: Effects of enflurane and halothane on liver blood flow and oxygen consumption in the greyhound. *Br J Anaesth* 52:1079-1086, 1980
223. Richardson PDI, Withrington PG: Liver blood flow. I. Intrinsic and nervous control of liver blood flow. *Gastroenterology* 81:159-173, 1981
224. Andreen M: Inhalation vs intravenous anaesthesia. Effects on the hepatic and splanchnic circulation. *Acta Anaesthesiol Scand* 75(suppl):25-31, 1982
225. Andreen M, Irestedt L, Zetterstrom B: The different responses of the hepatic arterial bed to hypovolaemia and to halothane anaesthesia. *Acta Anaesthesiol Scand* 21:457-469, 1977
226. Gelman S, Fowler KC, Smith LR: Regional blood flow during isoflurane and halothane anesthesia. *Anesth Analg* 63:557-565, 1984
227. Seyde WC, Longnecker DE: Effect of halothane, enflurane, or isoflurane on the regulation of total hepatic blood flow in rats (abstract). *ANESTHESIOLOGY* 61:A227, 1984
228. Refsum HE: Arterial hypoxaemia, serum activities of GO-T, GP-T and LDH and centrilobular liver cell necrosis in pulmonary insufficiency. *Clin Sci* 25:369-374, 1963
229. Berger PE, Culham JAG, Fitz CR, Harwood-Nash DC: Slowing of hepatic blood flow by halothane: angiographic manifestations. *Radiology* 118:303-306, 1976
230. Benumof JL, Bookstein JJ, Saidman LJ, Harris R: Diminished hepatic arterial flow during halothane administration. *ANESTHESIOLOGY* 45:545-551, 1976
231. Cascorbi HF, Vesell ES, Blake DA, Helrich M: Genetics and environmental influence on halothane metabolism in twins. *Clin Pharmacol Ther* 12:50-55, 1971
232. Hoft RH, Bunker JP, Goodman HI, Gregory PB: Halothane hepatitis in three pairs of closely related women. *N Engl J Med* 304:1023-1024, 1981
233. Eade OE, Grice D, Krawitt EL, Trowell J, Albertini R, Festenstein H, Wright R: HLA A and B locus antigens in patients with unexplained hepatitis following halothane anaesthesia. *Tissue Antigens* 17:428-432, 1981
234. Cousins MJ, Gourlay GK, Hall P, Adams J: Genetics and halothane hepatitis (letter). *Br Med J* 283:1334-1335, 1981
235. Holtzman JL, Gillette JR: The effect of phenobarbital on the turnover of microsomal phospholipid in male and female rats. *J Biol Chem* 243:3020-3028, 1968
236. Wark HJ: Postoperative jaundice in children. The influence of halothane. *Anaesthesia* 38:237-242, 1983
237. Warner LO, Beach TP, Garvin JP, Warner EJ: Halothane and children: the first quarter century. *Anesth Analg* 63:838-840, 1984
238. Barton JDM: Jaundice and halothane (letter). *Lancet* 1:1097, 1959
239. Campbell RL, Small EW, Lesesne HR, Levin KJ, Moore WH: Fatal hepatic necrosis after halothane anesthesia in a boy with juvenile rheumatoid arthritis: A case report. *Anesth Analg* 56:589-593, 1977
240. Crowe GR: Halothane hepatitis in children (letter). *Med J Aust* 1:794, 1977
241. Bentley JB, Vaughan RW, Gandolfi AJ, Cork RC: Halothane biotransformation in obese and nonobese patients. *ANESTHESIOLOGY* 57:94-97, 1982
242. Wark HJ, Clifton B, Bookallil MJ: Halothane hepatitis revisited in women undergoing treatment of carcinoma of the cervix. *Br J Anaesth* 51:763-766, 1979
243. Bruce DL, Koepke JA: Interaction of halothane and radiation in mice: possible implications. *Anesth Analg* 48:687-692, 1969
244. Greene NM: Halothane anesthesia and hepatitis in a high risk population. *N Engl J Med* 289:304-307, 1973
245. Touloukian J, Kaplowitz N: Halothane-induced hepatic disease. *Semin Liver Dis* 1:134-142, 1981
246. Van der Reis L, Askin SJ, Frecker GM, Fitzgerald WJ: Hepatic necrosis after enflurane anesthesia (letter). *JAMA* 227:76, 1974
247. Sadove MS, Kim SI: Hepatitis after use of two different fluorinated anesthetic agents. *Anesth Analg* 53:336-340, 1974
248. Denlinger JK, Lecky JH, Nahrwold ML: Hepatocellular dysfunction without jaundice after enflurane anesthesia. *ANESTHESIOLOGY* 41:86-87, 1974
249. Tsang HS: Jaundice after enflurane anesthesia. *IMJ* 148:593-594, 1975
250. Ona FV, Patanella H, Ayub A: Hepatitis associated with enflurane anesthesia. *Anesth Analg* 59:146-149, 1980
251. Kline MM: Enflurane-associated hepatitis. *Gastroenterology* 79:126-127, 1980
252. Danilewitz MD, Braude BM, Bloch HM, Botha J, Kew MC: Acute hepatitis following enflurane anaesthesia. *Br J Anaesth* 52:1151-1153, 1980
253. Dykes MHM: Is enflurane hepatotoxic? (editorial) *ANESTHESIOLOGY* 61:235-237, 1984
254. Douglas HJ, Eger EI II, Biava CG, Renzi C: Hepatic necrosis associated with viral infection after enflurane anesthesia *N Engl J Med* 296:553-555, 1977
255. McLaughlin DF, Eger EI: Repeated isoflurane anesthesia in a patient with hepatic dysfunction. *ANESTHESIOLOGY* 63:775-778, 1984
256. Strunin L, Davies JM: The liver and anaesthesia. *Can Anaesth Soc J* 30:208-217, 1983
